# Supplementary material for: A new species of the genus Sarsamphiascus Huys, 2009 (Copepoda: Harpacticoida: Miraciidae) from a sublittoral zone of Hawaii
Source: PeerJ. 2020 Feb 10;8:e8506. doi: 10.7717/peerj.8506 (PMC7017794; doi:10.7717/peerj.8506)
Supplement: Table S2 [file peerj-08-8506-s002.xlsx]

## Sheet: Sheet1
COI	Species name	1	2	3	4	5	6	7	8	9	10	11	12	13	14	15	16	17	18	19	20	21	22	23	24	25	26	27	28	29	30	31	32	33	34	35	36
1	Amonardia coreana
2	Amonardia normani	0.225097
3	Amonardia perturbata	0.22748	0.2522
4	Amphiascoides atopus	0.286079	0.304175	0.298519
5	Amphiascoides sp.	0.302407	0.335408	0.294408	0.238278
6	Amphiascopsis cinctus	0.36032	0.37248	0.38111	0.374304	0.363664
7	Amphiascus sp.	0.315118	0.313306	0.313599	0.26775	0.284494	0.37237
8	Bulbamphiascus imus	0.249104	0.25754	0.254409	0.244399	0.259924	0.331176	0.250643
9	Delavalia palustris	0.337256	0.383287	0.378416	0.373272	0.398419	0.378773	0.37105	0.335214
10	Delavalia reflexa	0.328533	0.341543	0.334014	0.318638	0.33663	0.333794	0.325309	0.300058	0.339859
11	Diosaccus ezoensis	0.307304	0.333432	0.295732	0.350031	0.341805	0.43056	0.311003	0.29268	0.369476	0.299645
12	Diosaccus spinatus	0.324922	0.338932	0.330071	0.329644	0.345137	0.377404	0.334661	0.33202	0.364261	0.344168	0.232141
13	Eoschizopera sp.	0.240449	0.278377	0.277883	0.237811	0.235105	0.335619	0.28937	0.229971	0.323299	0.300569	0.331334	0.338013
14	Haloschizopera pygmaea	0.307298	0.326623	0.348928	0.265588	0.267356	0.360818	0.287	0.283627	0.374573	0.294999	0.328953	0.349707	0.283355
15	Haloschizopera sp.	0.299539	0.314279	0.307594	0.264772	0.223145	0.34964	0.304104	0.260947	0.36063	0.347115	0.302568	0.315791	0.253441	0.255554
16	Itostenhelia golikovi	0.281802	0.346268	0.325349	0.345186	0.332375	0.415412	0.318507	0.292421	0.34925	0.359919	0.361062	0.42781	0.305228	0.330095	0.299578
17	Itostenhelia polyhymnia	0.323551	0.354209	0.316167	0.338528	0.328477	0.391796	0.351989	0.333986	0.331905	0.343682	0.369316	0.391386	0.293408	0.330433	0.299611	0.0550709
18	Macrosetella gracilis	0.335177	0.38355	0.381984	0.343357	0.338644	0.385702	0.353962	0.311143	0.42772	0.377606	0.335687	0.349707	0.292816	0.356931	0.329468	0.367413	0.351515
19	Miracia efferata	0.362625	0.346624	0.357094	0.306313	0.325231	0.374083	0.335568	0.302761	0.425357	0.341397	0.331079	0.348222	0.311924	0.358594	0.342054	0.342923	0.356936	0.274741
20	Sarsamphiascus hawaiiensis	0.250545	0.29608	0.273433	0.292846	0.272925	0.37726	0.2836	0.273362	0.359474	0.315622	0.340922	0.353885	0.279586	0.310114	0.29436	0.324624	0.350156	0.371884	0.34944
21	Sarsamphiascus kawamurai [SA]	0.27391	0.320126	0.299112	0.252194	0.237288	0.318781	0.275958	0.276081	0.389612	0.342313	0.350031	0.335495	0.245162	0.256924	0.25933	0.330792	0.333426	0.347102	0.322431	0.257881
22	Sarsamphiascus kawamurai [YD]	0.253352	0.303171	0.289943	0.242715	0.243298	0.312786	0.264744	0.257548	0.359697	0.315166	0.347384	0.353892	0.234865	0.262889	0.268436	0.314976	0.343682	0.338456	0.317617	0.241118	0.0432304
23	Sarsamphiascus undosus	0.266738	0.284988	0.286221	0.290933	0.270197	0.381984	0.293602	0.252717	0.400887	0.342703	0.329679	0.349983	0.268729	0.285597	0.264912	0.31929	0.346323	0.359659	0.310223	0.239052	0.230766	0.222441
24	Schizopera akation	0.301388	0.301821	0.30917	0.28071	0.267744	0.341823	0.299922	0.271018	0.337707	0.291845	0.317588	0.308419	0.251414	0.277438	0.269293	0.334602	0.326346	0.330082	0.306112	0.292551	0.299693	0.287864	0.297981
25	Schizopera akolos	0.285541	0.304456	0.285147	0.283326	0.296675	0.374325	0.336487	0.27699	0.353804	0.350995	0.355755	0.370319	0.268803	0.292022	0.313251	0.280947	0.297382	0.335432	0.303713	0.274779	0.295501	0.294955	0.315601	0.265876
26	Schizopera analspinulosa	0.29738	0.313918	0.271532	0.283102	0.289618	0.345644	0.33745	0.271466	0.346792	0.380629	0.338409	0.330145	0.275437	0.312018	0.300597	0.287526	0.291305	0.349256	0.289177	0.318725	0.285172	0.273577	0.304456	0.264819	0.222801
27	Schizopera emphysema	0.329954	0.290024	0.306863	0.26637	0.29733	0.398733	0.305383	0.26049	0.395565	0.355639	0.374415	0.365282	0.273999	0.301206	0.288821	0.344431	0.332317	0.356538	0.273247	0.308286	0.305181	0.311411	0.272387	0.271031	0.276967	0.246019
28	Schizopera knabeni	0.314895	0.324909	0.333638	0.303164	0.318172	0.38078	0.315503	0.330364	0.39684	0.348769	0.329124	0.313316	0.298569	0.326485	0.293028	0.35519	0.364211	0.384887	0.364093	0.285305	0.291357	0.299694	0.31178	0.277029	0.292075	0.300759	0.284829
29	Schizopera kronosi	0.266339	0.278504	0.269517	0.243429	0.263736	0.336479	0.300734	0.218299	0.328805	0.310481	0.302981	0.287864	0.23953	0.258568	0.254104	0.305406	0.328505	0.317195	0.276301	0.270649	0.254104	0.244992	0.276546	0.223738	0.192993	0.181295	0.228758	0.253988
30	Schizopera leptafurca	0.31774	0.299072	0.303036	0.269238	0.298181	0.40547	0.340422	0.280518	0.389417	0.342084	0.325208	0.343181	0.251811	0.289107	0.286703	0.349848	0.316713	0.319999	0.291547	0.298468	0.345231	0.329946	0.312018	0.261391	0.234063	0.239257	0.214887	0.28611	0.2148
31	Schizopera uranusi	0.261223	0.291387	0.279297	0.249989	0.276608	0.356391	0.286122	0.255502	0.365987	0.339821	0.32953	0.320379	0.265024	0.263718	0.266601	0.337933	0.323688	0.337152	0.29435	0.289317	0.247465	0.243191	0.29942	0.267855	0.220663	0.248875	0.192915	0.278083	0.218148	0.170383
32	Stenhelia pubescens	0.243761	0.313009	0.280561	0.291205	0.334227	0.34231	0.333105	0.288385	0.336623	0.307208	0.343017	0.365783	0.280789	0.304792	0.353439	0.344493	0.339719	0.332027	0.36033	0.317459	0.286175	0.284163	0.324416	0.285027	0.295501	0.353239	0.339033	0.322923	0.281868	0.322152	0.294231
33	Stenhelia taiae	0.280279	0.299888	0.292676	0.297677	0.332583	0.378386	0.365717	0.315755	0.372295	0.280602	0.321688	0.338883	0.288375	0.310304	0.306073	0.298782	0.302595	0.342105	0.346757	0.326362	0.308919	0.297402	0.315729	0.276388	0.292551	0.312287	0.337861	0.32782	0.283155	0.34141	0.295901	0.224902
34	Wellstenhelia calliope	0.277567	0.326326	0.303496	0.343655	0.346088	0.35395	0.375807	0.330188	0.337382	0.359618	0.329213	0.380485	0.350069	0.350821	0.339874	0.318636	0.332813	0.361166	0.379573	0.316909	0.333865	0.317206	0.351953	0.342342	0.332502	0.325255	0.365354	0.382684	0.302212	0.338801	0.354031	0.309531	0.341245
35	Wellstenhelia clio	0.278921	0.313434	0.323588	0.305272	0.316322	0.374386	0.34991	0.300164	0.326378	0.363354	0.333988	0.352597	0.300066	0.323649	0.335567	0.320571	0.325225	0.302027	0.338023	0.329518	0.296707	0.291186	0.323514	0.342069	0.338357	0.349331	0.3579	0.349521	0.298824	0.347663	0.312924	0.322797	0.315302	0.233938
36	Wellstenhelia qingdaoensis	0.318596	0.32477	0.344847	0.319843	0.374937	0.410784	0.319843	0.31151	0.341502	0.337127	0.347484	0.37884	0.328704	0.332256	0.349235	0.322363	0.329459	0.386574	0.358218	0.335188	0.345572	0.325887	0.339334	0.328173	0.320055	0.303276	0.35354	0.398225	0.331431	0.345874	0.344487	0.320651	0.298019	0.244815	0.215746
37	Willenstenhelia thalia	0.321826	0.368486	0.395596	0.32822	0.345987	0.427618	0.352132	0.343158	0.373729	0.333561	0.379441	0.389244	0.3262	0.34576	0.37127	0.313867	0.316373	0.389196	0.415122	0.331658	0.372441	0.359668	0.337611	0.384791	0.34801	0.342513	0.372203	0.397308	0.33366	0.357488	0.372079	0.343328	0.343222	0.376428	0.341499	0.355947

## Sheet: Caption
Table. Estimates of Evolutionary Divergence between Sequences
The number of base substitutions per site from between sequences are shown. Analyses were conducted using the Kimura 2-parameter model [1]. The analysis involved 37 nucleotide sequences. Codon positions included were 1st+2nd+3rd+Noncoding. All ambiguous positions were removed for each sequence pair. There were a total of 863 positions in the final dataset. Evolutionary analyses were conducted in …
1. Kimura M. (1980). A simple method for estimating evolutionary rate of base substitutions through comparative studies of nucleotide sequences. Journal of Molecular Evolution 16:111-120.
2. Kumar S., Stecher G., and Tamura K. (2016). MEGA7: Molecular Evolutionary Genetics Analysis version 7.0 for bigger datasets.Molecular Biology and Evolution 33:1870-1874.
Disclaimer: Although utmost care has been taken to ensure the correctness of the caption, the caption text is provided "as is" without any warranty of any kind. Authors advise the user to carefully check the caption prior to its use for any purpose and report any errors or problems to the authors immediately (www.megasoftware.net). In no event shall the authors and their employers be liable for a…
